# Supplementary material for: Absorption, metabolism, excretion, and safety of [14C]almonertinib in healthy Chinese subjects
Source: PubMed Central journal article supplement — Ann Transl Med. 2021 May;9(10):867. doi: 10.21037/atm-21-1606 (PMC8184462; doi:10.21037/atm-21-1606), 2021-05
Supplement: atm-09-10-867-dss.pdf [file atm-09-10-867-dss.pdf]

| Data Sharing Statement |                                                                                                                                                     |                                                                                                                  |
|------------------------|-----------------------------------------------------------------------------------------------------------------------------------------------------|------------------------------------------------------------------------------------------------------------------|
| <b>Article Info</b>    | <a href="http://dx.doi.org/10.21037/atm-21-1606">http://dx.doi.org/10.21037/atm-21-1606</a>                                                         |                                                                                                                  |
| <b>Item</b>            | <b>Question</b>                                                                                                                                     | <b>Authors' Response<br/>(place "-" if not applicable)</b>                                                       |
| 1                      | Would you like to share data collected for your study to others?                                                                                    | Yes                                                                                                              |
| 2                      | If not, would you like to share the reason for your decision?                                                                                       |                                                                                                                  |
| 3                      | What data in particular will be shared?                                                                                                             | The related pharmacokinetics and safety data.                                                                    |
| 4                      | Any other documents will be shared? Such as study protocol, statistical analysis plan, informed consent form, clinical study report, analytic code. | Statistical analysis plan, informed consent form, and clinical study report will also be shared if requested.    |
| 5                      | When will data availability begin?                                                                                                                  | From the publication date.                                                                                       |
| 6                      | When will data availability end?                                                                                                                    | Two years within the publication date.                                                                           |
| 7                      | To whom will you share the data?                                                                                                                    | People who are interested in studies of almonertinib.                                                            |
| 8                      | For what type of analysis or purpose?                                                                                                               | For analysis to study the pharmacokinetic characteristics and safety profile of almonertinib.                    |
| 9                      | How or where can the data/documents be obtained?                                                                                                    | Emails could be sent to the address below to obtain the shared data:<br>jsphkjzc@163.com                         |
| 10                     | Any other restrictions?                                                                                                                             | We may balance the potential benefits and risks for each request and then provide the data that could be shared. |
